# Supplementary material for: pH-Responsive doxorubicin-loaded magnetosomes for magnetic resonance-guided focused ultrasound real-time monitoring and ablation of breast cancer
Source: Royal Society of Chemistry journal article supplement (doi:10.1039/d3bm00789h), 2023-01-01
Supplement: d3bm00789h1.pdf [file d3bm00789h1.pdf]

## **pH-responsive doxorubicin-loaded magnetosomes for magnetic resonance-guided focused ultrasound real-time monitoring and ablation of breast cancer**

Na Tang,<sup>‡a,b</sup> Yi Zhu,<sup>‡b</sup> Ziwei Lu,<sup>‡c</sup> Jiali Deng,<sup>d,b</sup> Jiajing Guo,<sup>b</sup> Xinyi Ding,<sup>b</sup> Jingyi Wang,<sup>d,b</sup> Rong Cao,<sup>b</sup> An Chen,<sup>b</sup> Zhongyi Huang,<sup>e</sup> Hongwei Lu<sup>\*f</sup>, and Zhongling Wang<sup>\*b</sup>

<sup>a</sup>Shanghai Key Laboratory of Molecular Imaging, Shanghai University of Medicine and Health Sciences, Shanghai 201318, China.

<sup>b</sup>Department of Radiology, Shanghai General Hospital, Shanghai Jiao Tong University School of Medicine, Shanghai 200080, China. E-mail: zlwang138136@126.com

<sup>c</sup>Department of Radiology, the First Affiliated Hospital of Soochow University, Suzhou, Jiangsu 215006, China.

<sup>d</sup>School of Health Science and Engineering, University of Shanghai for Science and Technology, Shanghai, 200093, China.

<sup>e</sup>Department of Neurology, School of Medicine, New York University, New York, 10016, American.

<sup>f</sup>Department of Biomedical Engineering, College of Engineering, Shantou University, Shantou, 515063, China. E-mail: hwlu@stu.edu.cn

<sup>‡</sup>These authors contributed equally to this work.

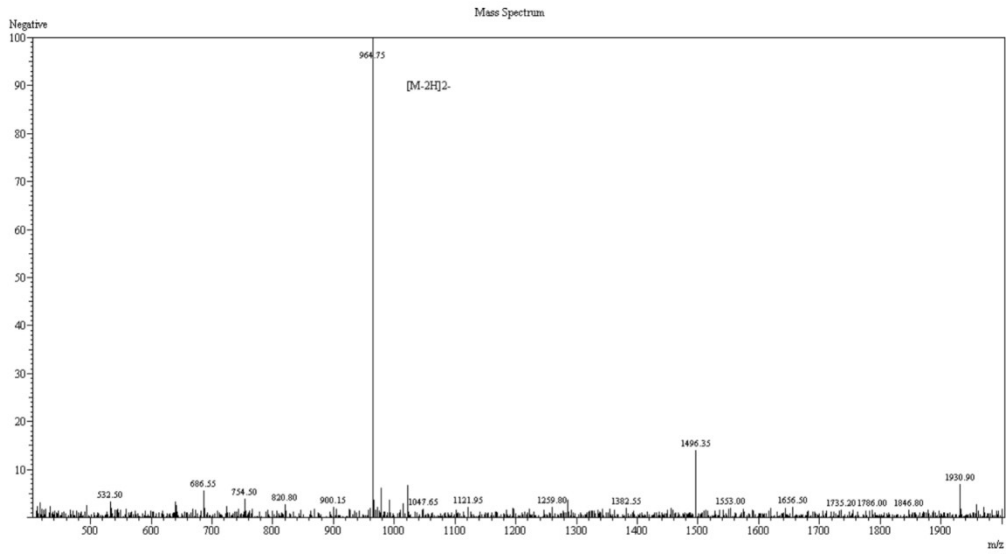

Fig. S1 Molecular weight of SKDEWHKNNFPLSP, measured with Maldi-Tof-Ms.

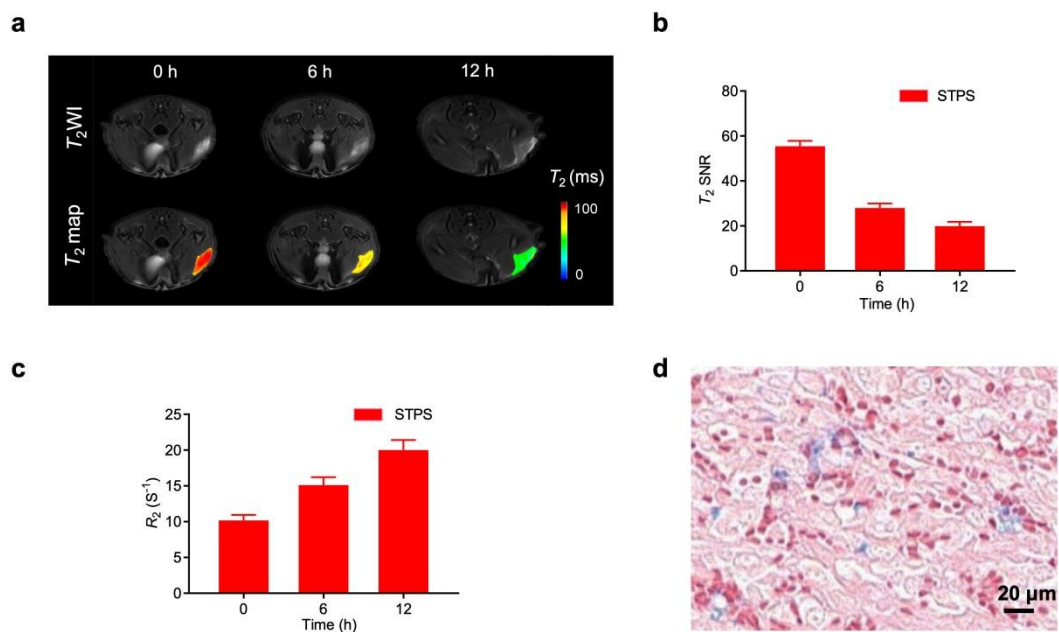

**Fig. S2 Non-invasive, in situ tumor monitoring of SPIO accumulation from the STPS nanoparticles by MRI.** (a-c)  $T_2$ -weighted images,  $T_2$  map (a),  $T_2$  SNR (b) and  $R_2$  values (c) of the tumors of the nude rat with breast cancer before injection, 6 and 12 hours after the STPS nanoparticles. Measure the mean  $T_2$  signal intensity of per tumor. Subsequently, calculating the relative signal-to-noise ratio (SNR =  $S_{\text{mean}}/\text{Standard deviation of noise (NSD)}$  (Standard deviation of the background signal)). Regions of interest (ROIs) are set to about 20-30  $\text{mm}^2$  in each tumor. (d) Prussian blue staining revealed the tumor deposition of STPS. All values are presented in mean  $\pm$  s.d. (n = 3).

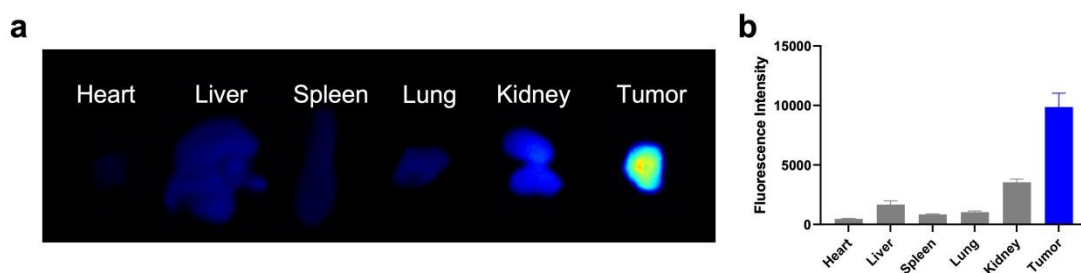

**Fig. S3** (a-b) Representative ex vivo fluorescence imaging (a) and quantitative analysis (b) of the heart, liver, spleen, lung, kidney and tumor of the mice injected with the STPSD after 24 h.

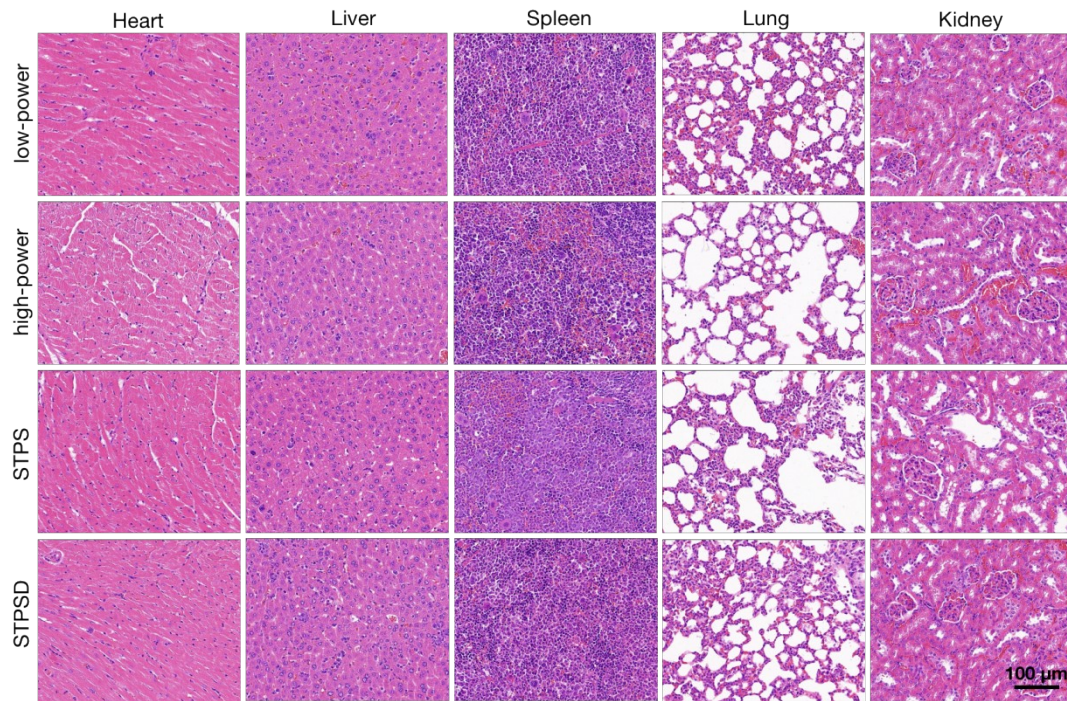

**Fig. S4** H&E staining of tissue slices of the main organs taken from mice 24 h after different treatment.

| Time (h) | STPS         |                          | STPSD        |                          |
|----------|--------------|--------------------------|--------------|--------------------------|
|          | $T_2$ SNR    | $R_2$ (S <sup>-1</sup> ) | $T_2$ SNR    | $R_2$ (S <sup>-1</sup> ) |
| 0        | 55.46 ± 2.39 | 10.18 ± 0.77             | 58.69 ± 3.43 | 10.00 ± 0.86             |
| 6        | 27.93 ± 2.04 | 15.12 ± 1.09             | 30.17 ± 2.48 | 13.66 ± 1.04             |
| 12       | 19.93 ± 1.89 | 20.00 ± 1.41             | 21.55 ± 2.59 | 18.03 ± 1.64             |

**Table.S1** The  $T_2$  SNR,  $R_2$  values of STPS and STPSD nanoparticles.

$T_2$  SNR and  $R_2$  of tumors were measured before and after injection of STPS and STPSD nanoparticles (1 mg/mL) (Timing: 0, 6, 12 h; n = 3) by tail vein injection (200  $\mu$ L/mL, 200  $\mu$ L). Data are represented by mean  $\pm$  s.d. (n = 3).

**Table.S2** Power, treatment time and temperature of the four groups.

| Groups/parameter   | Negative control | Positive control | STPS         | STPSD        |
|--------------------|------------------|------------------|--------------|--------------|
| Power (w)          | 53.37 ± 3.13     | 70.21 ± 3.38     | 53.44 ± 2.26 | 52.42 ± 2.73 |
| Treatment time (s) | 22.27 ± 1.48     | 21.94 ± 1.73     | 22.16 ± 1.63 | 22.39 ± 0.96 |
| Temperature (°C)   | 53.22 ± 2.34     | 67.91 ± 3.49     | 71.54 ± 3.18 | 72.45 ± 2.90 |

Numbers in the table are illustrated by mean ± s.d. (n = 3).
